# Supplementary material
Source: publisher figshare collection journal article supplement (https://frontiersin.figshare.com/ndownloader/files/14837594)
Supplement: Supplementary file [file 14837594]

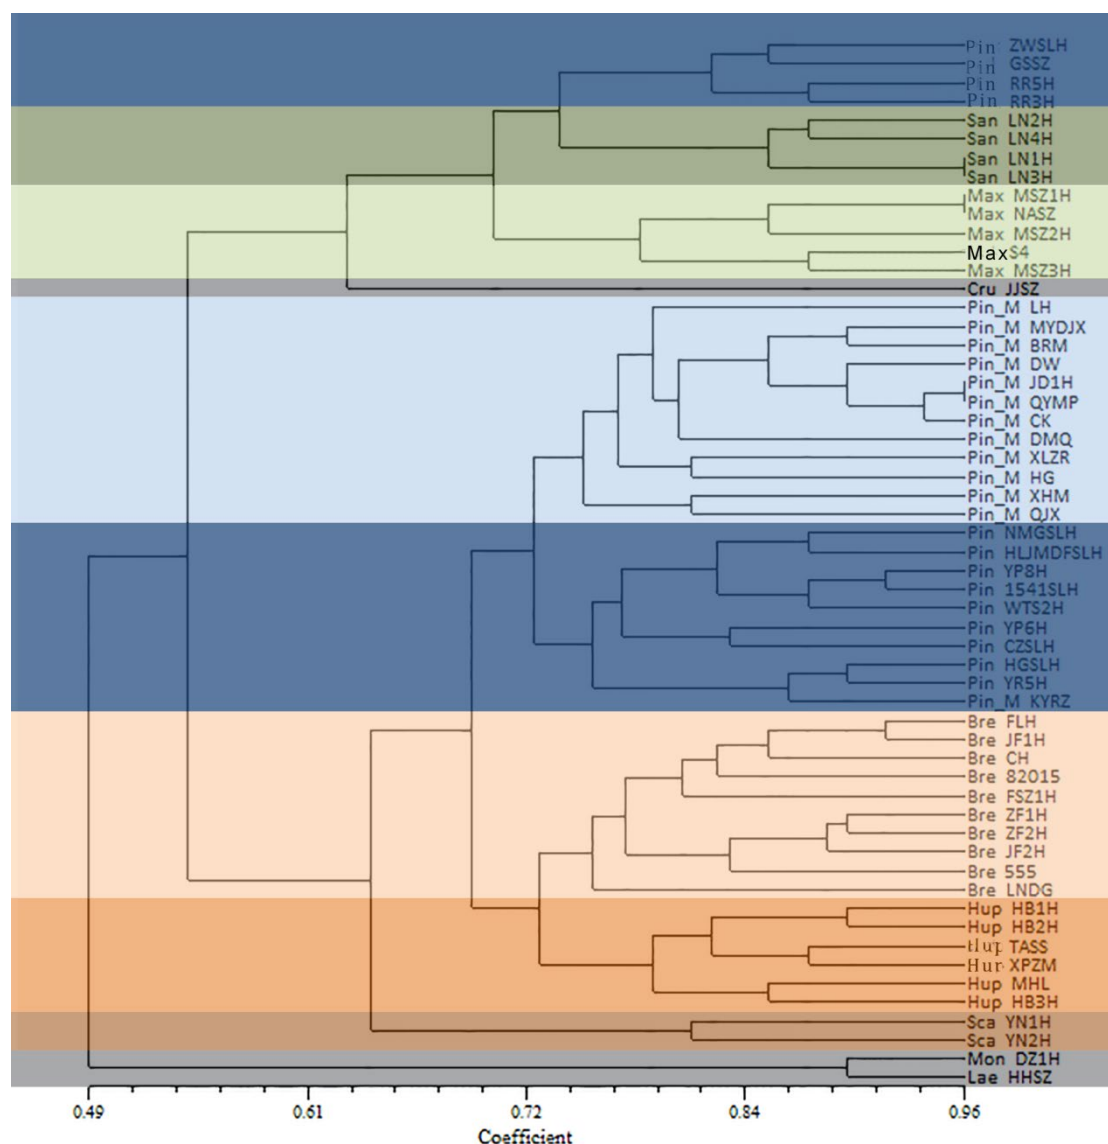

**Figure S1** Dendrogram of *Crataegus* species based on nSSR polymorphism. Cluster analysis was performed using the UPGMA method. The names of fifty six individuals are given next to their branches. (Abbreviated species names: San: *C. sanguineae*; Max: *C. maximowiczii*; Cru: *C. cruss-galli*; Pin\_M: *C. pinnatifida*. var. *major*; Pin: *C. pinnatifida*; Bre: *C. bretschnideri*; Hup: *C. hupehensis*; Sca: *C. scabrifolia*; Mon: *C. monogyna*; Lae: *C. laevigata*).
